# Supplementary material
Source: HighWire-hosted journal article supplement (https://bmjopenrespres.bmj.com/content/suppl/2020/12/21/7.1.e000770)
Supplement: bmjresp-2020-000770supp002_data_supplement.pdf [file bmjresp-2020-000770supp002_data_supplement.pdf]

## PICO Table

### Population

- Adults >18 years old with asthma or clinical suspicion of asthma

### Intervention

- Physiological tests small airways function

### Comparator

- FEV<sub>1</sub>

### Outcome

- Diagnosis of asthma

PICO chart with details of study selection criteria.
